# Supplementary material for: Estimation of Carbon Metabolism in Saccharomyces cerevisiae Acclimatized to Glycerol Assimilation with Quantitative PCR
Source: MDPI journal article supplement (doi:10.3390/microorganisms10061173), 2022-06-07
Supplement: s1 [file s1]

## Supplementary Materials

**Supplemental Table S1.** Gene information. All data were mainly provided by Alliance of Genome Resources, Nov 2021 and support data were obtained from additional references.

| Gene         | Location                                 | Other Expression                 | Additional Reference |
|--------------|------------------------------------------|----------------------------------|----------------------|
| <i>PGM1</i>  | cytosol                                  |                                  |                      |
| <i>PGM2</i>  | cytosol                                  | <i>GAL5</i>                      |                      |
| <i>PRM15</i> | cytosol; nucleus                         | <i>PGM3</i>                      |                      |
| <i>PGI1</i>  | mitochondrion                            | <i>CDC30</i>                     | (1)                  |
| <i>HXK</i>   | cytosol; mitochondrion                   |                                  |                      |
| <i>HXK1</i>  | mitochondrion                            |                                  | (2)                  |
| <i>HXK2</i>  | cytosol; mitochondrial membrane; nucleus | <i>HEX1, HKB, SCI2</i>           |                      |
| <i>GLK1</i>  | cytosol; plasma membrane                 | <i>HOR3</i>                      |                      |
| <i>GAL10</i> | cytosol                                  |                                  |                      |
| <i>PFK1</i>  | mitochondrion                            |                                  | (3)                  |
| <i>FBP1</i>  | cytosol; periplasmic space               | <i>ACN8</i>                      |                      |
| <i>FBA1</i>  | cytosol; mitochondrion                   | <i>LOT1</i>                      |                      |
| <i>TPI1</i>  | mitochondrion                            |                                  | (4)                  |
| <i>TDH1</i>  | cell wall; lipid droplet; mitochondrion  | <i>GLD3</i>                      | (2)                  |
| <i>TDH2</i>  | cell wall; lipid droplet; mitochondrion  | <i>GLD2</i>                      | (2)                  |
| <i>TDH3</i>  | cell wall; lipid droplet; mitochondrion  | <i>GLD1, HSP35, HSP36, SSS2.</i> | (2)                  |
| <i>PGK1</i>  | mitochondrion                            |                                  |                      |
| <i>TDA10</i> | cytosol; nucleus                         |                                  |                      |
| <i>ALD2</i>  | cytosol                                  |                                  | (5),(6)              |
| <i>ALD3</i>  | cytosol                                  |                                  | (7)                  |
| <i>ALD4</i>  | mitochondrion; cytosol                   |                                  | (5),(8)              |
| <i>ALD5</i>  | mitochondrion; cytosol                   |                                  | (5),(6)              |
| <i>ALD6</i>  | mitochondrion; cytosol                   |                                  | (5)                  |
| <i>HFD1</i>  | lipid droplet                            |                                  |                      |
| <i>GCY1</i>  | cytosol; nucleus                         |                                  |                      |
| <i>DAK1</i>  | cytosol                                  |                                  |                      |
| <i>DAK2</i>  | cytosol                                  |                                  |                      |
| <i>GUT1</i>  | mitochondrion; cytosol                   |                                  | (9)                  |
| <i>GPP1</i>  | cytosol                                  |                                  |                      |
| <i>GPP2</i>  | cytosol; nucleus                         | <i>HOR2</i>                      |                      |
| <i>GPT2</i>  | endoplasmic reticulum; lipid droplet     | <i>GAT1</i>                      |                      |
| <i>SCT1</i>  | endoplasmic reticulum; lipid droplet     | <i>GAT2</i>                      |                      |
| <i>PHM8</i>  | cytosol; nucleus                         |                                  |                      |
| <i>GPM2</i>  | cytosol                                  |                                  |                      |

|              |                                                |                     |      |
|--------------|------------------------------------------------|---------------------|------|
| <i>ENO1</i>  | fungus-type vacuole; mitochondrion;<br>cytosol | <i>HSP48</i>        | (10) |
| <i>CDC19</i> | cytosol                                        | <i>PYK1</i>         |      |
| <i>PCK1</i>  | cytosol                                        | <i>JPM2, PPC1</i>   |      |
| <i>PDA1</i>  | mitochondrial nucleoid                         |                     |      |
| <i>PDB1</i>  | mitochondrial nucleoid                         |                     |      |
| <i>THI3</i>  | nucleus                                        | <i>KID1</i>         |      |
| <i>PDC1</i>  | cytosol; nucleus; replication compartment      |                     |      |
| <i>PDC5</i>  | nucleus                                        |                     |      |
| <i>PDC6</i>  | cytoplasm                                      | <i>RHR2</i>         |      |
| <i>LPD1</i>  | mitochondrion                                  | <i>HPD1</i>         |      |
| <i>LAT1</i>  | mitochondrion                                  | <i>ODP2, PDA2</i>   |      |
| <i>ACS1</i>  | cytosol                                        | <i>FUN44</i>        |      |
| <i>ACS2</i>  | cytosol; nucleolus                             |                     |      |
| <i>HFD1</i>  | lipid droplet                                  |                     |      |
| <i>ADH1</i>  | cytoplasm; replication compartment;<br>cytosol | <i>ADC1</i>         |      |
| <i>ADH2</i>  | cytosol                                        | <i>ADR2</i>         |      |
| <i>ADH3</i>  | mitochondrial matrix; cytosol                  |                     |      |
| <i>ADH4</i>  | mitochondrion; cytosol                         | <i>NRC465, ZRG5</i> |      |
| <i>ADH5</i>  | cytoplasm; nucleus                             |                     |      |
| <i>ADH6</i>  | cytosol                                        |                     |      |
| <i>ADH7</i>  | cytosol                                        |                     |      |
| <i>SFA1</i>  | mitochondrion                                  | <i>ADH5</i>         |      |
| <i>CIT1</i>  | mitochondrion                                  | <i>LYS6</i>         |      |
| <i>CIT2</i>  | peroxisome                                     |                     |      |
| <i>CIT3</i>  | mitochondrion                                  |                     |      |
| <i>ACO1</i>  | cytosol; mitochondrion                         | <i>GLU1</i>         |      |
| <i>IDP1</i>  | mitochondrion                                  |                     |      |
| <i>IDP2</i>  | cytosol                                        |                     |      |
| <i>IDP3</i>  | peroxisome                                     |                     |      |
| <i>IDH1</i>  | mitochondrion                                  |                     |      |
| <i>IDH2</i>  | mitochondrion                                  |                     |      |
| <i>KGD1</i>  | mitochondrion                                  | <i>OGD1</i>         |      |
| <i>LPD1</i>  | mitochondrion                                  | <i>HPD1</i>         |      |
| <i>KGD2</i>  | mitochondrion                                  |                     |      |
| <i>LSC1</i>  | mitochondrion                                  |                     |      |
| <i>LSC2</i>  | mitochondrion                                  |                     |      |

|             |                                  |                   |
|-------------|----------------------------------|-------------------|
| <i>SDH1</i> | mitochondrion                    |                   |
| <i>SDH2</i> | mitochondrion                    | <i>ACN17</i>      |
| <i>SDH3</i> | mitochondrion                    | <i>CYB3, YKL4</i> |
| <i>SDH4</i> | mitochondrion                    | <i>ACN18</i>      |
| <i>SDH9</i> | mitochondrion                    |                   |
| <i>SHH3</i> | mitochondrion                    |                   |
| <i>SHH4</i> | fungus-type vacuole              |                   |
| <i>FUM1</i> | cytosol; mitochondrion; nucleus. |                   |
| <i>MDH1</i> | mitochondrion                    |                   |
| <i>MDH2</i> | cytosol; nuclear periphery       |                   |
| <i>MDH3</i> | peroxisome                       |                   |
| <i>PCK1</i> | cytosol                          | <i>JPM2, PPC1</i> |

---

### Supplemental References

- Papapetridis I, Verhoeven MD, Wiersma SJ, Goudriaan M, van Maris AJA, Pronk JT. Laboratory evolution for forced glucose-xylose co-consumption enables identification of mutations that improve mixed-sugar fermentation by xylose-fermenting *Saccharomyces cerevisiae*. 2018. FEMS Yeast Res 18:foy056.
- Thakur SS, Geiger T, Chatterjee B, Bandilla P, Fröhlich F, Cox J, Mann M. Deep and highly sensitive proteome coverage by LC-MS/MS without prefractionation. 2011. Mol Cell Proteomics 10:M110.003699.
- Petelenz-Kurziel E, Kuehn C, Nordlander B, Klein D, Hong K-K, Jacobson T, Dahl P, Schaber J, Nielsen J, Hohmann S, Klipp E. Quantitative analysis of glycerol accumulation, glycolysis and growth under hyper osmotic stress. 2013. PLoS Comput. Biol. 9:e1003084.
- Marta V, Kostyantyn V. Metabolic engineering for high glycerol production by the anaerobic cultures of *Saccharomyces cerevisiae*. 2016. apply microbial biotechnol 101:4403-4416.
- Daran-Lapujade P, Jansen MLA, Daran JM, van Gulik W, de Winde JH, Pronk JT. Role of transcriptional regulation in controlling fluxes in central carbon metabolism of *Saccharomyces cerevisiae*. A chemostat culture study. 2004. J Biol Chem 279:9125-9138.
- Yu M, Juwono N.K.P, Foo J.L, Leong S.S, Chang M.W, Metabolic engineering of *Saccharomyces cerevisiae* for the overproduction of short branched-chain fatty acids. 2016. Meta. Eng 34:36-43.
- Bakker BM, Bro C, Kotter P, Luttik MAH, Dijken JP, Pronk JT. The Mitochondrial alcohol Dehydrogenase Adh3p Is Involved in a Redox Shuttle in *Saccharomyces cerevisiae*. 2000. ASM 182:4730-4737.
- Hoang P.T.N, Ko ja K, Gong G, Um Y, Lee S.M. Genomic and phenotypic characterization of a refactored xylose-utilizing *Saccharomyces cerevisiae* strain for lignocellulosic biofuel production. 2018. Biotechnol Biofuel Bioproducts 11:268.
- Costenoble R, Valadi H, Gustafsson L, Niklasson C, Franzén CJ. Microaerobic glycerol formation in *Saccharomyces cerevisiae*. Yeast 16: 1483-1495.

- Norbeck J, Blomberg A. Metabolic and regulatory changes associated with growth of *Saccharomyces cerevisiae* in 1.4 M NaCl. Evidence for osmotic induction of glycerol dissimilation via the dihydroxyacetone pathway. 1997. J Biol Chem 272:5544-5554.
- (10)

**Supplemental Table S2.** Primer-pairs of each enzyme gene were prepared for qPCR.

| Gene  |   | Primer Sequences (5'→3')        |
|-------|---|---------------------------------|
| TDH2  | F | cggtagatacgtggtgaagtttc         |
|       | R | tggaagatggagcagtgataacaac       |
| TDH3  | F | ttcccacgatgacaagcac             |
|       | R | gaagcccatggcaagttagc            |
| RDN18 | F | aactcaccaggtccagacacaataagg     |
|       | R | aaggtctcgttcgttatcgcaattaagc    |
| KRE11 | F | aactggttctgttacccaaatcaactcaac  |
|       | R | aacgcttcaatgtgacttctgtttccc     |
| SGA1  | F | tccaaacggatatttctgggtggtactgag  |
|       | R | gcatgatctattgtgttacattagcgggtag |
| PGM1  | F | tgatcctgcaaagcatac              |
|       | R | ttgcgctgttcgctaagaa             |
| PGM2  | F | gcctgggtacctctggtttgc           |
|       | R | ccatcaccaccgacaacaag            |
| PRM15 | F | aagaggtcaccgctctctgc            |
|       | R | accagcagtgccaaactgaa            |
| PGI1  | F | acttcacccaaacccattg             |
|       | R | tcgaatggagcaaccaaatg            |
| HXK   | F | aggggaggtagttgcaatgg            |
|       | R | tccggtgaaaggaagattgg            |
| HXK1  | F | attccaatgattcccgttg             |
|       | R | ccgctcaactgaccaacac             |
| HXK2  | F | aaattttgcgtttgccttg             |
|       | R | tgtccatgacgaaaggcttg            |
| GLK1  | F | gccggtcatcggtgtattt             |
|       | R | gacccccattcgacattgat            |
| GAL10 | F | tgaaatggcagaccgagttg            |
|       | R | gcctcgacacccttaactg             |
| PFK1  | F | actcccgtgcctttgttgtt            |
|       | R | atcggcaccggttagcaatac           |
| FBP1  | F | cgctcaaaaggccatctac             |
|       | R | tgtctgcttggggtgtttg             |
| FBA1  | F | ggcttgcaccaatctctc              |
|       | R | aaagcgtgtcaccagcgta             |
| TPI1  | F | ggtaccggtttggctgctac            |
|       | R | gctaccgttagcgggaaccac           |

|              |   |                      |
|--------------|---|----------------------|
| <i>TDH1</i>  | F | atggtccatcccacaaggac |
|              | R | ggcaagaccttaccgacagc |
| <i>PGK1</i>  | F | attggtggtggtgacactgc |
|              | R | agcaacacctggcaattcct |
| <i>TDA10</i> | F | gcgcaaccagaaatcaa    |
|              | R | gcacttgttcgtcggtcatc |
| <i>ALD2</i>  | F | tcattccccaaccatcttc  |
|              | R | gcgagcccgtagcaagtatc |
| <i>ALD3</i>  | F | tcattccccaaccatcttc  |
|              | R | gcgagcccgtagcaagtatc |
| <i>ALD4</i>  | F | aaccaacggggtgttcac   |
|              | R | gcctctccacatcgtctc   |
| <i>ALD5</i>  | F | aaggctcgtgccgatactg  |
|              | R | cgcagcaaacttcaccagag |
| <i>ALD6</i>  | F | tgaatgggctaccaagacc  |
|              | R | gtaacatccccacgggctaa |
| <i>HFD1</i>  | F | gcgcacaaaaggaaaagctc |
|              | R | ggcgtaaccccacttgta   |
| <i>GCY1</i>  | F | tggcagtcgaaagagaacga |
|              | R | ttgatggcttgaccgacttg |
| <i>DAK1</i>  | F | aggcggtaaaagctgcagag |
|              | R | tgaatcgccgacatacgaag |
| <i>DAK2</i>  | F | ctgatcgtgctctgcaacc  |
|              | R | ttcggcaccatcataagcag |
| <i>GUT1</i>  | F | atggcgactgacgactcta  |
|              | R | tagccattggaccacagcac |
| <i>GPP1</i>  | F | catcgaagttcagggtgctg |
|              | R | gtcacgggtaccagaggtg  |
| <i>GPP2</i>  | F | cattgaagtcacaggtgcag |
|              | R | atcacgggtaccggaagttg |
| <i>GPT2</i>  | F | accacccggaatcatcaag  |
|              | R | tccgggatttccttgatttg |
| <i>SCT1</i>  | F | tatggctcttggtgcatgg  |
|              | R | atggggtcaccgaattcaac |
| <i>PHM8</i>  | F | ttgcaaagtggtgtcgag   |
|              | R | atggataacatggcccatcc |
| <i>GPM2</i>  | F | gcaagcacaccatccaatgt |
|              | R | gcgtcaatccaaccacagaa |

|              |   |                      |
|--------------|---|----------------------|
| <i>ENO1</i>  | F | tgacgaagggtggtgtgctc |
|              | R | cttaccgtcgtgaccagcag |
| <i>CDC19</i> | F | cgatttgccagctttgtctg |
|              | R | aaaacatcgttggcggttct |
| <i>PCK1</i>  | F | cagaatcaaagtccgcgttg |
|              | R | ctgaccagcgttccagacag |
| <i>PDA1</i>  | F | cttcattcaaacgccaacca |
|              | R | tgtcctcaggggccttctta |
| <i>PDB1</i>  | F | ccgctttgaagggtttgaag |
|              | R | tttgagcgggaattgacaac |
| <i>THI3</i>  | F | gcaagctctttgggatctg  |
|              | R | ttgcggggaatttctcttg  |
| <i>PDC1</i>  | F | catgatcagatggggcctga |
|              | R | gagcctttggaccgtgaatc |
| <i>PDC5</i>  | F | gatcagaaacgccacttcc  |
|              | R | ctgggacagcaacaggtttg |
| <i>PDC6</i>  | F | gcctcacgcagagtacaacg |
|              | R | tggcgatcttgtattttcg  |
| <i>LPD1</i>  | F | gccacgggctctgaagttac |
|              | R | aaccatttccaatccgatg  |
| <i>LAT1</i>  | F | ggctaagagggtgccagatg |
|              | R | gtggcaacagcgactgagac |
| <i>ACS1</i>  | F | tttatgttgcgccaactgc  |
|              | R | accaagcaacgcaaagatt  |
| <i>ACS2</i>  | F | ccttgggtaccgcctcaata |
|              | R | tgggtagccttgtgacgttg |
| <i>HFD1</i>  | F | gcgcacaaaaggaaaagctc |
|              | R | ggcgtaacccccacttgta  |
| <i>ADH1</i>  | F | cgttaagggtggaagatcg  |
|              | R | ccagacaagtcagcgtgagg |
| <i>ADH2</i>  | F | cgttaagggtggaagatcg  |
|              | R | ccagacaagtcagcgtgagg |
| <i>ADH3</i>  | F | aagccgcaaaattcaacag  |
|              | R | accagagatggcaaccagt  |
| <i>ADH4</i>  | F | gctgttgctgtcaacgatcc |
|              | R | gaggcgggtggaacataagc |
| <i>ADH5</i>  | F | tcgatgggtgtaatgccaag |
|              | R | actccatgagaaccgcatt  |

|             |   |                       |
|-------------|---|-----------------------|
| <i>ADH6</i> | F | tccatcacatttggctgctc  |
|             | R | ttttacctggaccgcaacc   |
| <i>ADH7</i> | F | ggc gatcatgacgttgatgt |
|             | R | tgggactggacccaattac   |
| <i>SFA1</i> | F | aatgactgatgggggtctgg  |
|             | R | ggcagccacaccaatgataa  |
| <i>CIT1</i> | F | acccatggccaaatgttgat  |
|             | R | ggagcaccaacagccctatc  |
| <i>CIT2</i> | F | attcggatcacgaagggtgt  |
|             | R | caaacctgatgcaagggaca  |
| <i>CIT3</i> | F | tgcgttgagtgaccgtatc   |
|             | R | cttgtgtgctaacctatgc   |
| <i>ACO1</i> | F | tgccatcaagagaccattg   |
|             | R | tccagcgtttccacattctg  |
| <i>IDP1</i> | F | atgtgccaccatcactcctg  |
|             | R | cgccgagaatgtttctgatg  |
| <i>IDP2</i> | F | tcggccaaatattggaaagc  |
|             | R | tagattccaccgctcaatg   |
| <i>IDP3</i> | F | ataggccgtcatgcttttgg  |
|             | R | gcgatcccaccacttttagg  |
| <i>IDH1</i> | F | atccgtccctggtgtagtgg  |
|             | R | ggcgaagtcaaaggcaaatc  |
| <i>IDH2</i> | F | aaggtggtcaccaaccatc   |
|             | R | taaagaaccggcgctcaaac  |
| <i>KGD1</i> | F | acccattcccatttgctcag  |
|             | R | tctgtgtatgccacgaacc   |
| <i>LPD1</i> | F | gccacgggctctgaagtac   |
|             | R | aaccatttccaatccgatg   |
| <i>KGD2</i> | F | tattccagccgtcaatggtg  |
|             | R | ttacgaacgacgggggtaac  |
| <i>LSC1</i> | F | atgggtggtgatgcttttcc  |
|             | R | ttcgatttcggccttaccac  |
| <i>LSC2</i> | F | ggatttccagcgttactcc   |
|             | R | cctctacctccggtcaatgc  |
| <i>SDH1</i> | F | attccacgaagtggaatgg   |
|             | R | ttggcaccatggacagaaac  |
| <i>SDH2</i> | F | ggaaggcctttgtttggtg   |
|             | R | tagcacttggtcgtctgga   |



|             |   |                      |
|-------------|---|----------------------|
| <i>SDH3</i> | F | ctccgccttttcaagagcag |
|             | R | ccgctttggtgttcatttca |
| <i>SDH4</i> | F | caggtggtgttaggggcact |
|             | R | acgacggacaaggcaaagat |
| <i>SDH9</i> | F | gggtctggctgcctaatac  |
|             | R | ttccatggtgattgctctgg |
| <i>SHH3</i> | F | ccccgagcatctgtattcgt |
|             | R | cggccattgtggaattcttt |
| <i>SHH4</i> | F | aaagcagagctcagggttcg |
|             | R | accaagggaactgcgatcag |
| <i>FUM1</i> | F | aagaatgccattgcctttgg |
|             | R | ggcctgttgaaatagccttg |
| <i>MDH1</i> | F | tccgtggtcaaggggttac  |
|             | R | atggcgaacaagtcacacg  |
| <i>MDH2</i> | F | acatggaacgcaaccaaag  |
|             | R | tcgatgcaacgaattccaag |
| <i>MDH3</i> | F | tggaaagttcgaccaaag   |
|             | R | ctgcacgtaccaggtcaagg |
| <i>PCK1</i> | F | cagaatcaaagtccgcgttg |
|             | R | ctgaccagcgttcagacag  |

---
